# Supplementary material for: A Facile approach to NiCoO2intimately standing on nitrogen doped graphene sheets by one-step hydrothermal synthesis for supercapacitors
Source: Royal Society of Chemistry journal article supplement (doi:10.1039/c5ta00298b), 2015-01-01
Supplement: c5ta00298b1.pdf [file c5ta00298b1.pdf]

## Supporting Information

### A Facile Approach to NiCoO<sub>2</sub> Intimately Standing on Nitrogen Doped Graphene Sheets by One-step hydrothermal Synthesis for Supercapacitors

Yazhou Xu<sup>a</sup>, Junchao Wei<sup>a,b</sup>, Licheng Tan<sup>a,b</sup>, Ji Yu<sup>a</sup>, Yiwang Chen<sup>\*a,b</sup>

<sup>a</sup>College of Chemistry/Institute of Polymers, Nanchang University, 999 Xuefu  
Avenue, Nanchang 330031, China

<sup>b</sup>Jiangxi Provincial Key Laboratory of New Energy Chemistry, Nanchang University,  
999 Xuefu Avenue, Nanchang 330031, China

Corresponding author. Tel.: +86 791 83968703; fax: +86 791 83969561. E-mail:  
ywchen@ncu.edu.cn (Y. Chen)

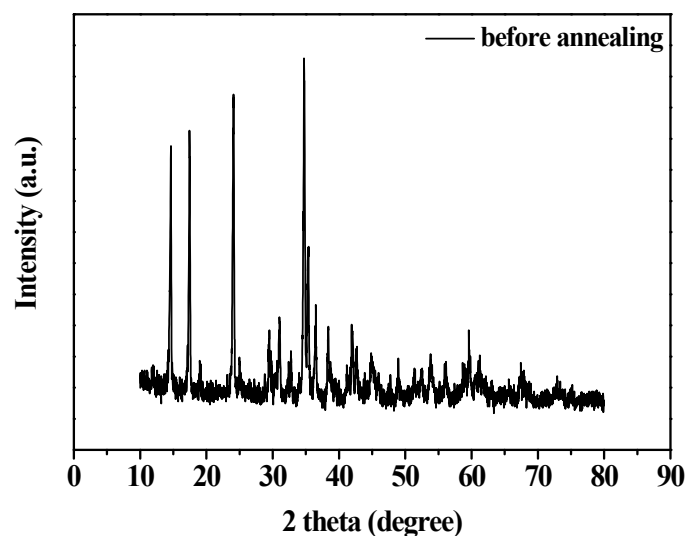

**Figure S1.** XRD pattern of the NiCoO<sub>2</sub>-NRGO composites before annealing.

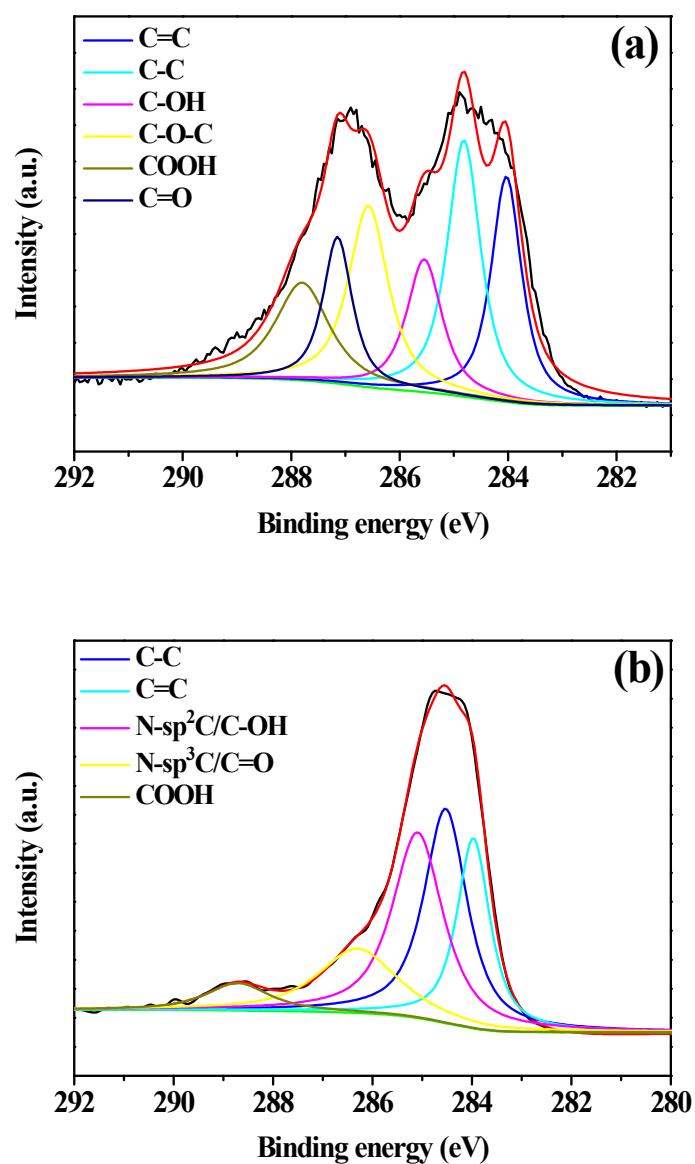

**Figure S2.** (a) High-resolution XPS spectra of C 1s for GO, (b) High-resolution XPS spectra of C 1s for NRGO.

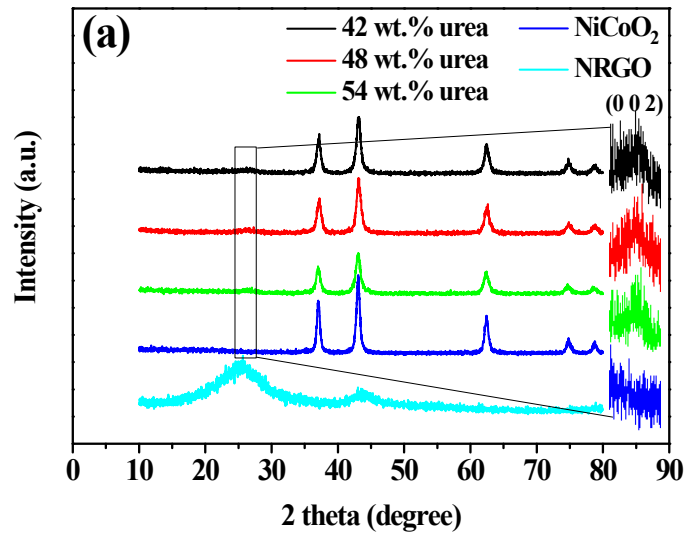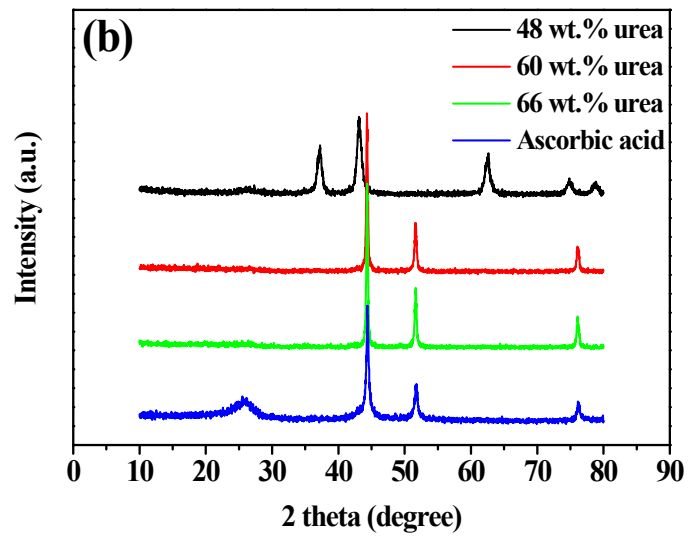

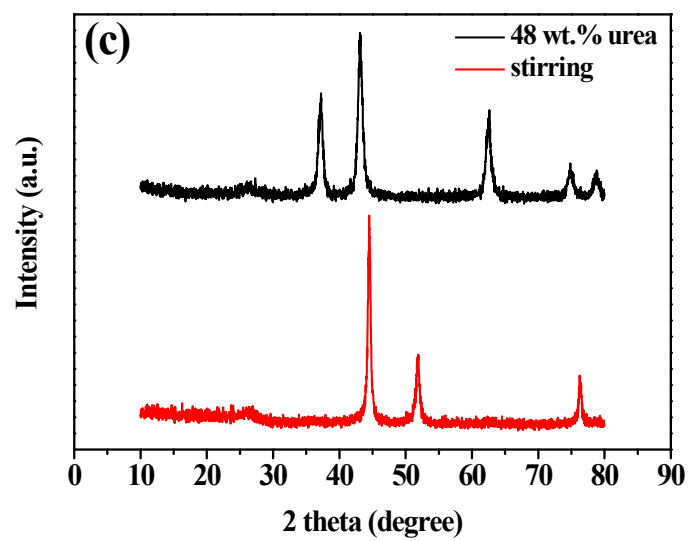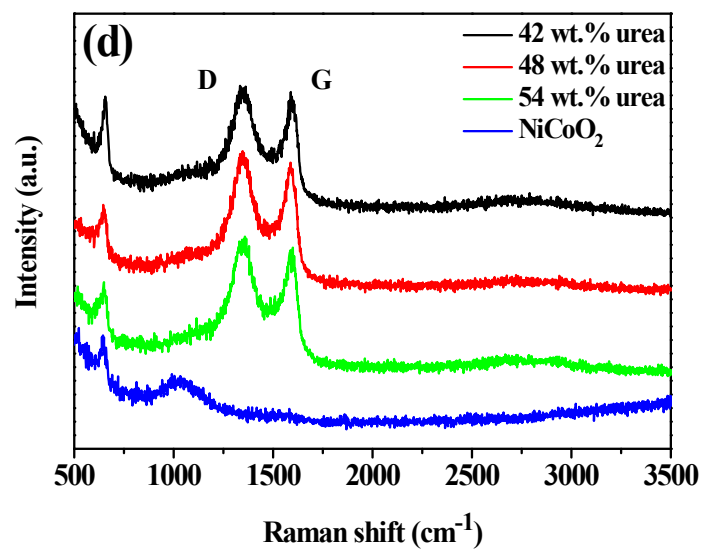

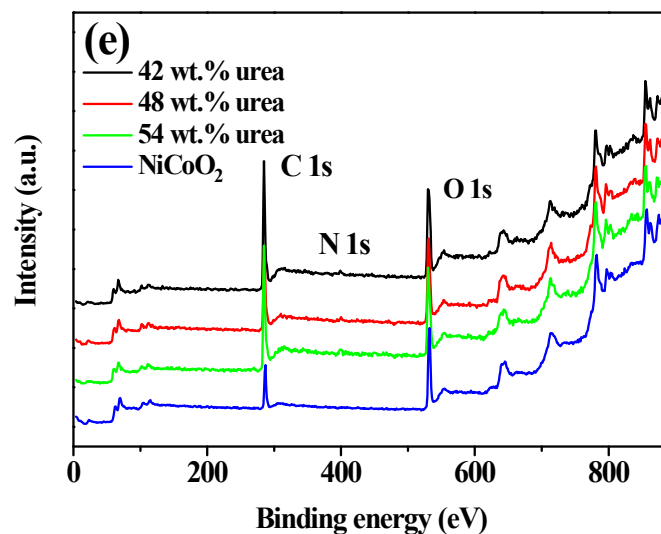

**Figure S3.** Structure characterization of the NiCoO<sub>2</sub>-NRGO composites with increasing weight rate of urea: (a) XRD pattern of the NiCoO<sub>2</sub>-NRGO composites with various weight rate of urea ranging from 42 wt.% to 54 wt.%, (b) XRD pattern of the NRGO-NiCoO<sub>2</sub> composites with various weight rate of urea ranging from 60 wt.% to 66 wt.% and the reduction of NiCoO<sub>2</sub>-NRGO composites through ascorbic acid, (c) XRD pattern of the NiCoO<sub>2</sub>-NRGO composites prepared through different methods, (d) Raman spectra of NiCoO<sub>2</sub>-NRGO composites with various weight rate of urea, (e) XPS of NiCoO<sub>2</sub>-NRGO composites with various weight rate of urea.
